# Supplementary material for: Regulation of luminescence band and exploration of antibacterial activity of a nanohybrid composed of fluorophore-phenothiazine nanoribbons dispersed with Ag nanoparticles
Source: Royal Society of Chemistry journal article supplement (doi:10.1039/c3tc30515e), 2013-01-01
Supplement: c3tc30515e.pdf [file c3tc30515e.pdf]

Supporting Information for:

**Regulation of luminescence band and exploration of antibacterial activity of a nanohybrid composed of flurophore-phenothiazine nanoribbons dispersed with Ag nanoparticles**

Lin Kong, Jia-xiang Yang, Zhao-Ming Xue, Hong-ping Zhou, Long-jiu Cheng,

Qiong Zhang, Jie-ying Wu, Bao-kang Jin, Sheng-Yi Zhang, Yu-peng Tian

**Contents:**

1. Preparation of Intermediate **1~2**
2. XRD patterns of **L** single crystal
3. Low resolution SEM of **L/Ag** nanohybrids
4. The fragments selected for weak interactions
5. UV-Vis spectrum of Phenothiazine
6. Cyclic-voltammetric response of phenothiazine fragement and  $\text{AgNO}_3$
7. The comparison of H-NMR spectrum of **L** and **L/Ag** nanohybrid
8. Effect of concentration of  $\text{AgNO}_3$  on the formation of **L/Ag** nanohybrids
9. Antibacterial effect (MIC)
10. Reference

**Preparation of Intermediate 1:** 10-Ethyl-10H-phenothiazine-3-carbaldehyde was prepared in our laboratory previously [S1]. To synthesize Intermediate 1, 10-Ethyl-10H-phenothiazine-3-carbaldehyde (0.51 g, 2 mmol) was dissolved in 20 mL methanol, NaBH<sub>4</sub> (0.19 g, 5 mmol) was added in batches. After the solution was stirred for 6 h, methanol was evaporated to get intermediate **1** as a white solid. <sup>1</sup>H NMR (400 MHz, *d*<sub>6</sub>-DMSO) δ(ppm): 7.18 (t, 1H, *J* = 8.0 Hz); 7.11 (t, 1H, *J* = 7.6 Hz); 7.07 (s, 1H); 6.99 (d, 2H, *J* = 8.4 Hz); 6.95 (d, 1H, *J* = 8.0 Hz); 6.91 (t, 1H, *J* = 7.2 Hz); 5.09 (s, 1H); 4.38 (s, 2H); 3.89 (m, 2H); 1.28 (t, 3H, *J* = 6.8 Hz). <sup>13</sup>C NMR (100 MHz, *d*<sub>6</sub>-DMSO) δ(ppm): 149.76, 148.18, 141.96, 132.80, 132.20, 131.11, 130.47, 128.08, 127.90, 127.42, 120.52, 120.32, 67.32, 46.26, 17.88.

Then, intermediate **2** (0.26 g, 1 mmol), triphenylphosphine (0.31 g, 1.2 mmol) were dissolved in CHCl<sub>3</sub> (30 mL), then, KI solution (0.25 g, 1.5 mmol, dissolved in 1 mL water), glacial acetic acid (5 mL) and little 18-C-6 were added to the above CHCl<sub>3</sub> solution. The as-prepared solution was stirred for one week. The reaction was monitored by TLC to ensure complete reaction. Then, the solvent was removed with a rotary evaporator. The residue was then washed with dimethylbenzene to obtain 0.61 g intermediate **2** as a light yellow solid (95% in yield).

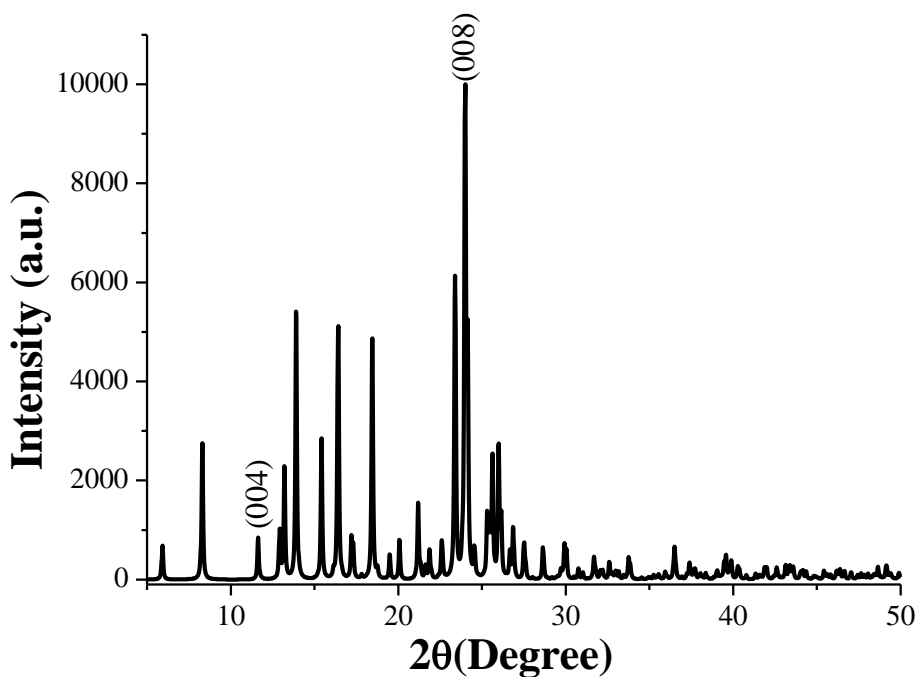

**Fig. S1** XRD patterns of **L** single crystal

**Table S1.** Bond lengths [ $\text{\AA}$ ] and angles [ $^\circ$ ] for **L**

|                   |          |                   |          |                   |           |
|-------------------|----------|-------------------|----------|-------------------|-----------|
| C(1)-C(2)         | 1.386(4) | S(1)-C(1)         | 1.760(3) | C(6)-N(1)         | 1.416(4)  |
| C(1)-C(6)         | 1.403(4) | C(7)-N(1)         | 1.410(4) | C(13)-N(1)        | 1.467(3)  |
| C(7)-C(12)        | 1.405(4) | C(10)-C(15)       | 1.491(5) | C(15)-C(16)       | 1.295(4)  |
| C(16)-C(17)       | 1.477(5) | C(17)-C(18)       | 1.377(4) | C(20)-C(23)       | 1.461(5)  |
| C(23)-O(1)        | 1.213(4) | C(2)-H(2)         | 0.9300   |                   |           |
| C(2)-C(1)-S(1)    | 120.6(2) | C(3)-C(2)-C(1)    | 120.4(3) | C(1)-S(1)-C(12)   | 97.76(15) |
| C(7)-N(1)-C(6)    | 117.8(2) | O(1)-C(23)-C(20)  | 125.4(4) | C(8)-C(7)-N(1)    | 124.2(3)  |
| C(16)-C(15)-C(10) | 128.1(3) | C(15)-C(16)-C(17) | 124.6(4) | C(19)-C(20)-C(23) | 120.1(3)  |

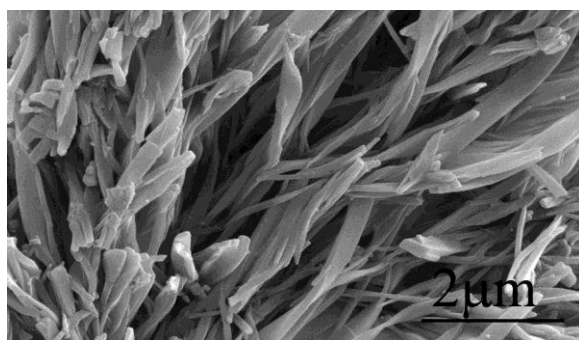

**Fig. S2** SEM of **L** nanoribbons obtained from THF-H<sub>2</sub>O solution

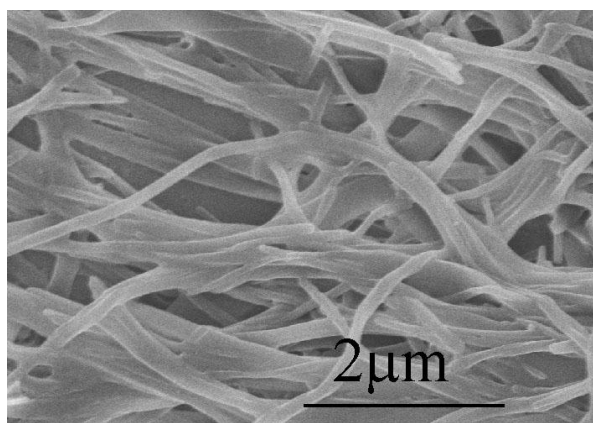

Fig. S3 SEM of L nanoribbons obtained from EtOH-H<sub>2</sub>O solution

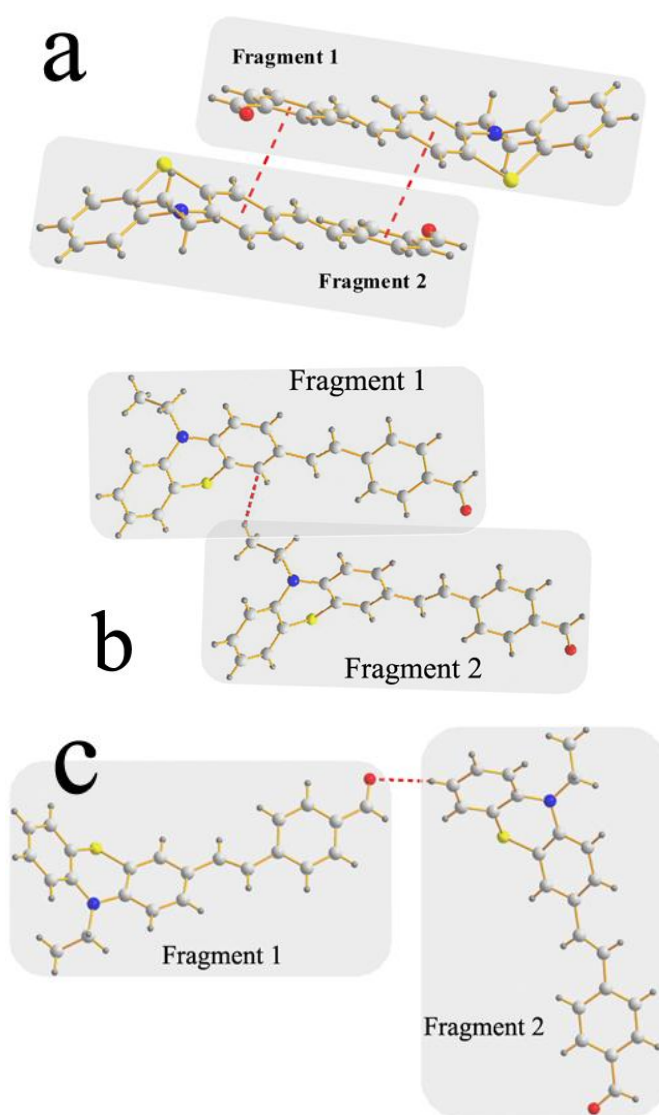

Fig. S4. Fragments selected for weak interactions along: (a) *a* axis, (b) *b* axis, (c) *c* axis.

**Table S2** Calculated excitation energies (E), oscillator strengths (f), corresponding wavelengths ( $\lambda_{\text{abs}}$ ) and major contributors for **L**

| Comp.    | E(eV)  | $\lambda_{\text{abs}}$ (nm) | f      | Nature of Transitions |
|----------|--------|-----------------------------|--------|-----------------------|
| <b>L</b> | 3.0849 | 401.90                      | 0.3491 | HOMO→LUMO             |
|          | 3.9107 | 317.04                      | 0.5140 | HOMO-1→LUMO           |

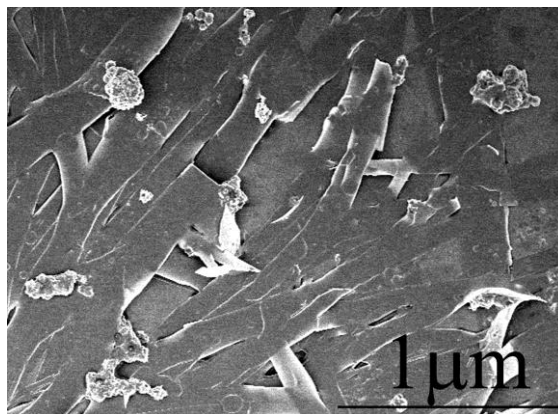

**Fig. S5** SEM micrograph of the mixture physically mixed **L** nanoribbons and Ag NCs

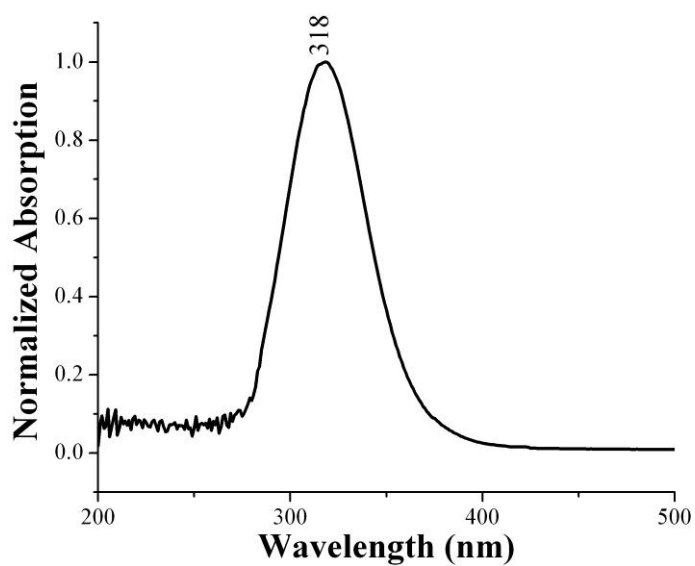

**Fig. S6** UV-Vis spectrum of phenothiazine fragment

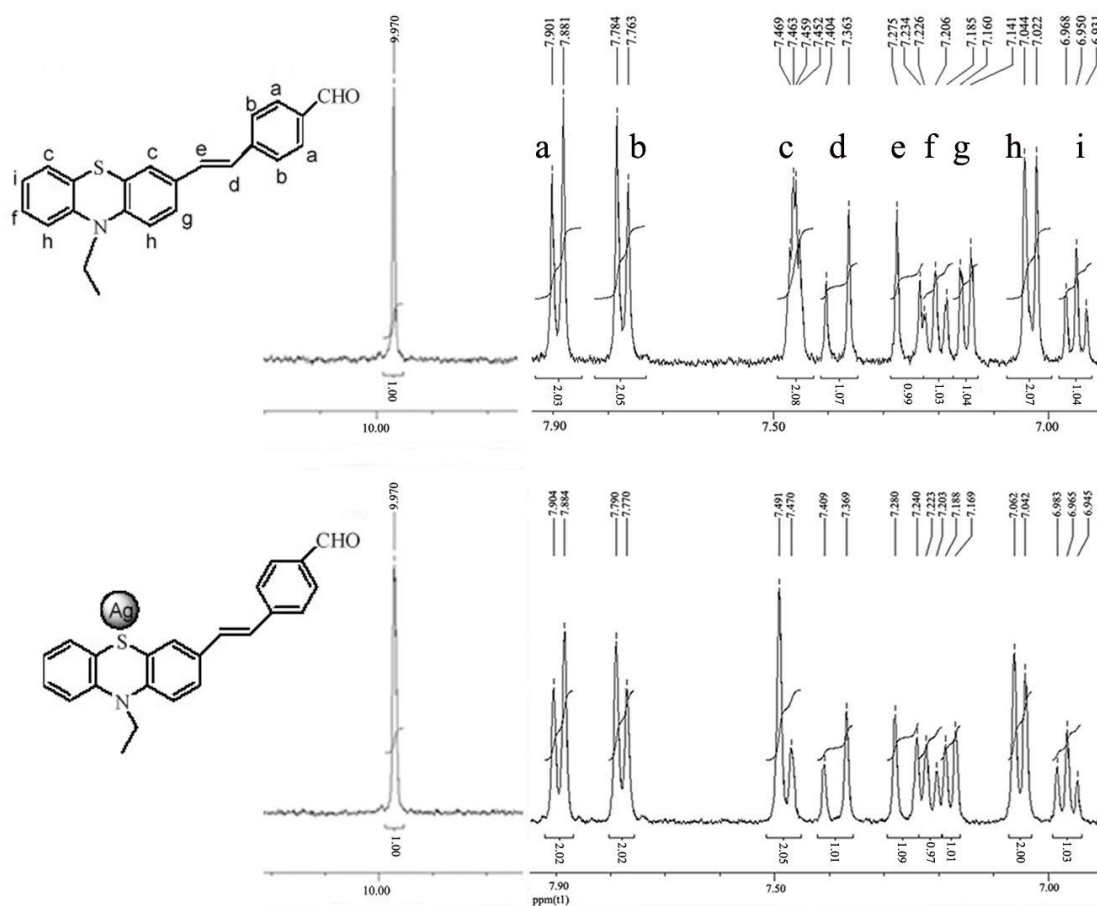

**Fig. S7** A comparison of  $^1\text{H-NMR}$  spectrum of **L** and **L/Ag** nanohybrid

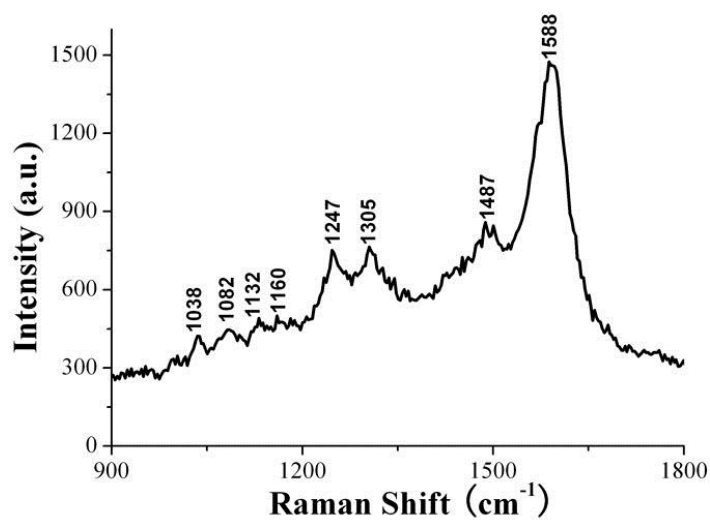

**Fig. S8** Raman spectrum of phenothiazine fragment

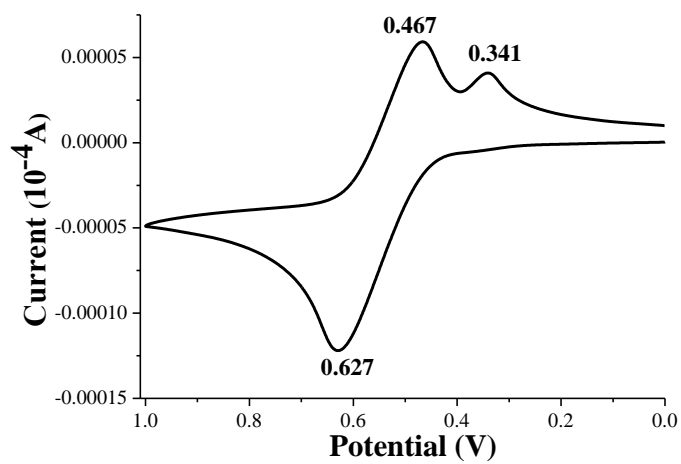

**Fig. S9** Cyclic-voltammetric response of phenothiazine fragment

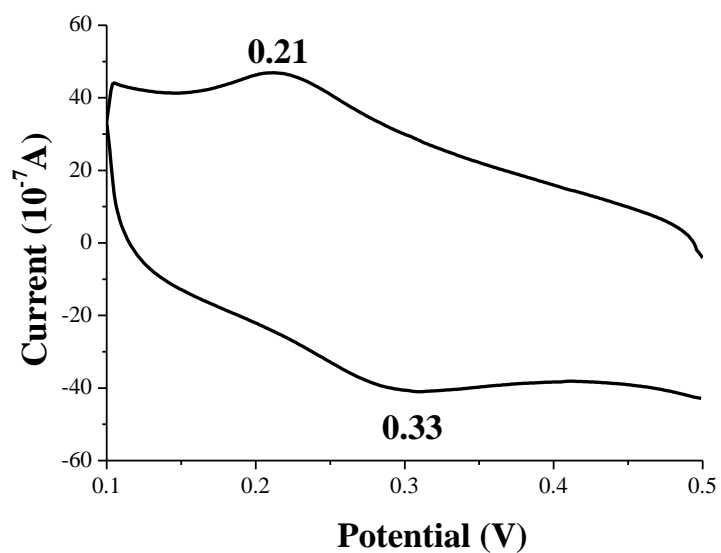

**Fig. S10** Cyclic-voltammetric response of  $\text{AgNO}_3$

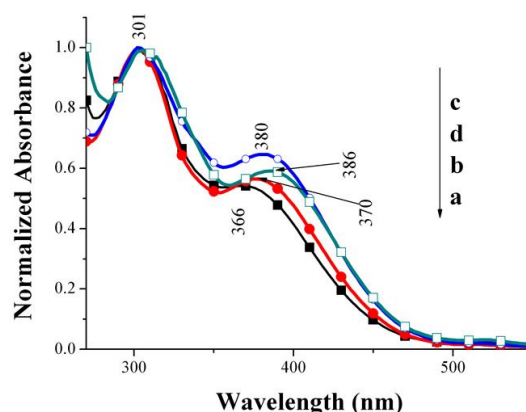

**Figure S11** UV-vis spectra of **L/Ag** nanohybrids prepared with different molar ratio of **L** to **Ag**

(a) 1**L**:10**Ag**; (b) 1**L**:1**Ag**; (c) 2**L**:1**Ag**; (d) 5**L**:1**Ag**.

### Effect of concentration of $\text{AgNO}_3$ on the formation of the nanohybrid

It was found that the number of **Ag** NPs attaching on **L** nanoribbons was also depended on the concentration of  $\text{AgNO}_3$ . When the usage of  $\text{AgNO}_3$  was very few, only a small amount of **Ag** NPs scattered in distribution on the surface of **L** nanoribbons (as shown in Fig. S12-a and -b). As the usage of  $\text{AgNO}_3$  increased, the number of **Ag** NPs clinging to **L** ribbons increased along with it (**Fig. S12-c to -f**), and **Ag** NPs tended to aggregate more and more at the same time. It can also be seen that the size of **Ag** NPs changed little. The results revealed that **L** was a very important factor in determining the size of **Ag** NPs in this work. Clearly, an optimum particle size should exist to balance the appropriate bandgap and couple with **L**.

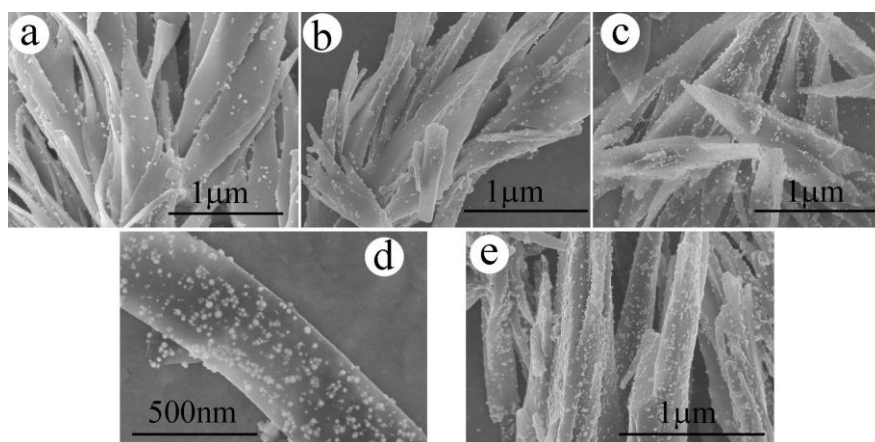

**Figure S12.** SEM images of the as-prepared products at various concentration of  $\text{AgNO}_3$ :

(a) **L**: **Ag** = 5:1; (b) **L**: **Ag** = 2:1; (c) **L**: **Ag** = 1:3; (d) **L**: **Ag** = 1:5; (e) **L**: **Ag** = 1:10.



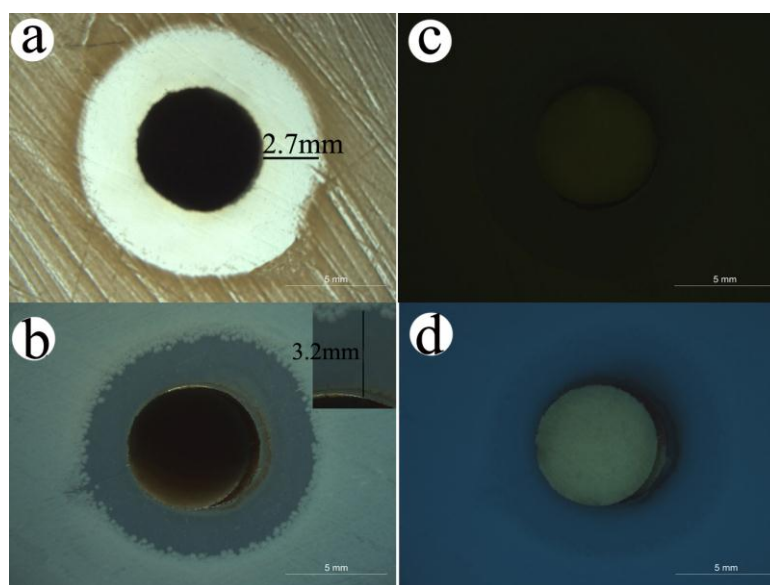

**Fig. S13** Photograph images of the zone of inhibition of *S. aureus*. (a)-(b) bright-field image of **L** and **L/Ag** nanohybrids, respectively; (c)-(d) fluorescence microscopy of (a)-(b) respectively.

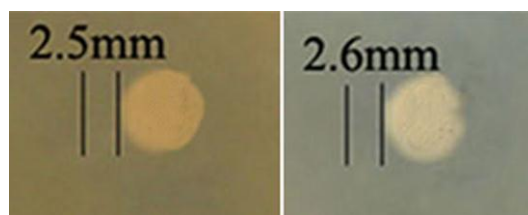

**Fig S14** Photograph images of the zone of inhibition of Ag NPs for *S. aureus* (left) and *E. coli* (right)

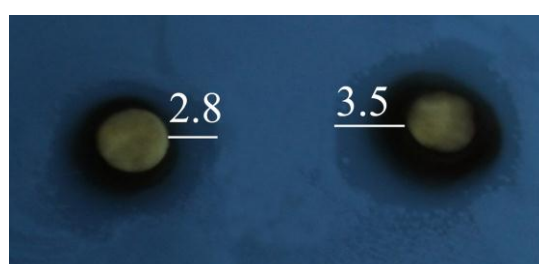

**Fig S15** Photograph images of the zone of inhibition of the mixture physically mixed **L** nanofibres and Ag NCs for *S. aureus* (left) and *E. coli* (right)

### MIC of Antibacterial Effect

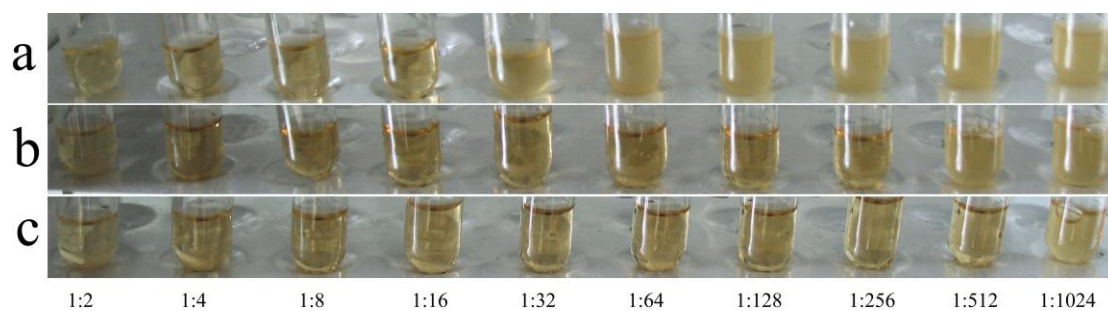

**Figure S16** Antibacterial effect of (a) L (b) Ag (c) L/Ag nanohybrid

### Reference

- S1 D. H. Yu, J. Q. Wang, L. Kong and Z. D. Liu, 10-Ethyl-10H-phenothiazine-3-carbaldehyde, *Acta Crystallographica Section E*, **2011**, E67, o3344.
